# Supplementary material
Source: PubMed Central journal article supplement (PMC4739781)
Supplement: NIHMS746281-supplement-Graphical_Abstract.pdf [file NIHMS746281-supplement-Graphical_Abstract.pdf]

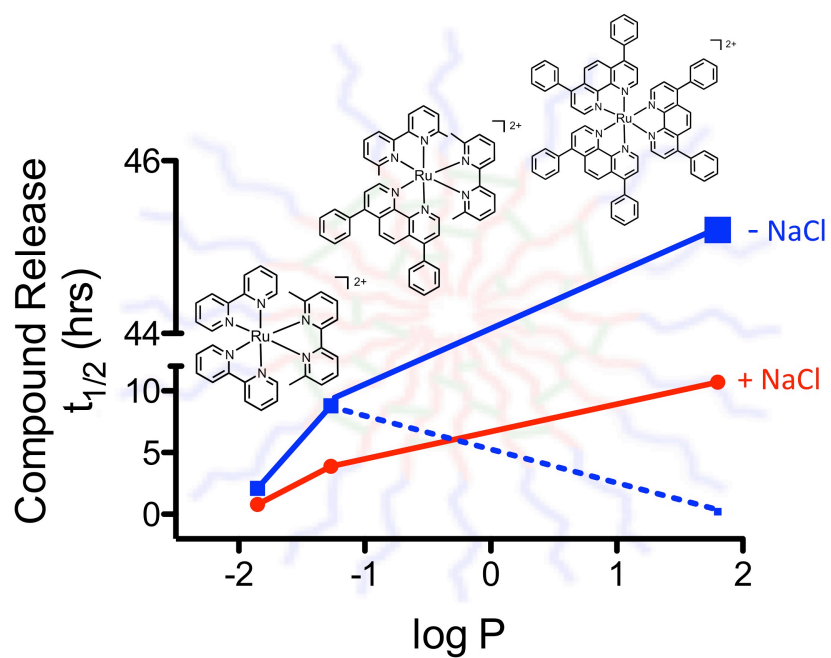

Cross-linked polymeric nanoassemblies are potential carrier systems for cytotoxic ruthenium complexes, and exhibit a combination of electrostatic and hydrophobic interactions with the metal complexes that impact release rates, release percentages, and biological activity.
